# Supplementary material for: Perturbation Biology: Inferring Signaling Networks in Cellular Systems
Source: PubMed Central journal article supplement (PMC3868523; doi:10.1371/journal.pcbi.1003290), 2013-12-19

# Prior Knowledge Interactions in Modeling

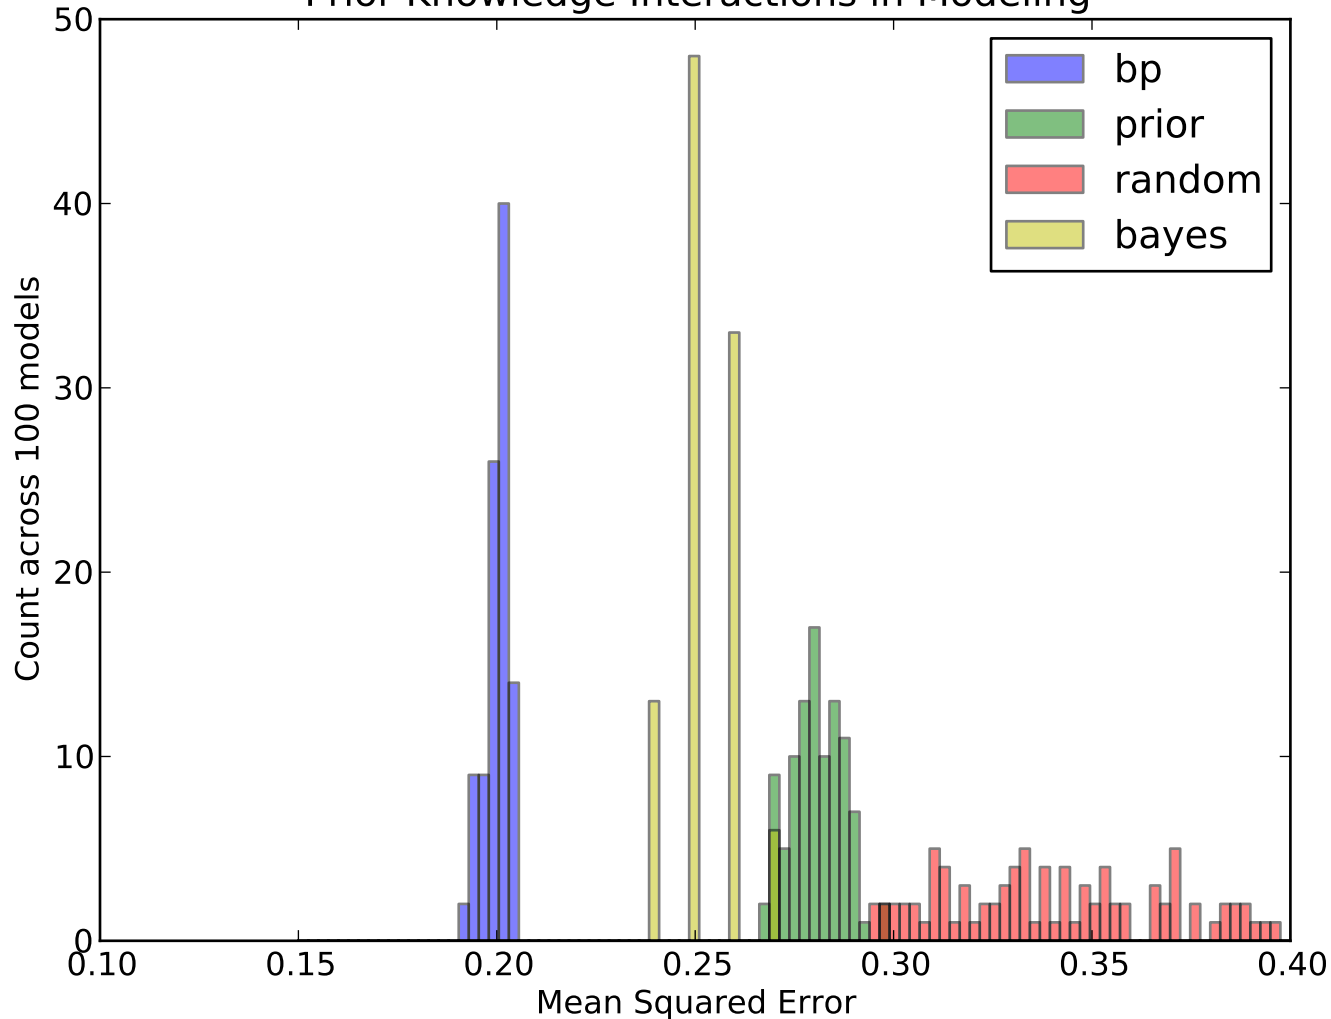

Supplement: pcbi.1003290.s020.pdf [file pcbi.1003290.s020.pdf]
